# Supplementary material for: Genome Size in the Arenaria ciliata Species Complex (Caryophyllaceae), with Special Focus on Northern Europe and the Arctic
Source: MDPI journal article supplement (doi:10.3390/plants13050635), 2024-02-26
Supplement: s1 [file s1]

## Supplementary Materials

### Genome Size in the *Arenaria ciliata* Species Complex (Caryophyllaceae), with Special Focus on Northern Europe and the Arctic

Kozłowski et al.

**Table S1.** Characterization of all collected taxa and samples from the *Arenaria ciliata* species complex. with the corresponding genome sizes (2c values in pg of DNA and the nuclei number per analyzed sample).

| Taxon                         | Coll_date  | Lat       | Lon        | Region        | Country   | Elev | 2c   | Nuclei |
|-------------------------------|------------|-----------|------------|---------------|-----------|------|------|--------|
| <i>Arenaria pseudofrigida</i> | 20.07.2023 | 72.50517  | -23.95197  | Traill Island | Greenland | 100  | 1.61 | 203    |
| <i>Arenaria pseudofrigida</i> | 20.07.2023 | 72.50517  | -23.95248  | Traill Island | Greenland | 100  | 1.58 | 178    |
| <i>Arenaria pseudofrigida</i> | 20.07.2023 | 72.50514  | -23.9525   | Traill Island | Greenland | 100  | 1.58 | 289    |
| <i>Arenaria pseudofrigida</i> | 20.07.2023 | 72.50523  | -23.9524   | Traill Island | Greenland | 100  | 1.61 | 186    |
| <i>Arenaria pseudofrigida</i> | 20.07.2023 | 72.50525  | -23.95214  | Traill Island | Greenland | 100  | 1.63 | 368    |
| <i>Arenaria pseudofrigida</i> | 20.07.2023 | 72.50111  | -24.00326  | Traill Island | Greenland | 10   | 1.58 | 188    |
| <i>Arenaria pseudofrigida</i> | 20.07.2023 | 72.50117  | -24.00292  | Traill Island | Greenland | 10   | 1.63 | 121    |
| <i>Arenaria pseudofrigida</i> | 20.07.2023 | 72.5004   | -24.00373  | Traill Island | Greenland | 10   | 1.63 | 307    |
| <i>Arenaria pseudofrigida</i> | 20.07.2023 | 72.50101  | -24.00321  | Traill Island | Greenland | 10   | 1.66 | 162    |
| <i>Arenaria pseudofrigida</i> | 20.07.2023 | 72.50111  | -24.00335  | Traill Island | Greenland | 10   | 1.58 | 116    |
| <i>Arenaria pseudofrigida</i> | 20.07.2023 | 72.50113  | -24.00331  | Traill Island | Greenland | 10   | 1.54 | 352    |
| <i>Arenaria pseudofrigida</i> | 25.07.2023 | 75.143    | -19.734184 | Hochstetter   | Greenland | 30   | 1.84 | 198    |
| <i>Arenaria pseudofrigida</i> | 25.07.2023 | 75.143    | -19.734184 | Hochstetter   | Greenland | 30   | 1.77 | 757    |
| <i>Arenaria pseudofrigida</i> | 25.07.2023 | 75.143    | -19.734184 | Hochstetter   | Greenland | 30   | 1.78 | 312    |
| <i>Arenaria pseudofrigida</i> | 25.07.2023 | 75.143    | -19.734184 | Hochstetter   | Greenland | 30   | 1.67 | 148    |
| <i>Arenaria pseudofrigida</i> | 25.07.2023 | 75.143    | -19.734184 | Hochstetter   | Greenland | 30   | 1.69 | 128    |
| <i>Arenaria pseudofrigida</i> | 25.07.2023 | 75.143    | -19.734184 | Hochstetter   | Greenland | 30   | 1.69 | 235    |
| <i>Arenaria pseudofrigida</i> | 25.07.2023 | 75.143    | -19.734184 | Hochstetter   | Greenland | 30   | 1.61 | 410    |
| <i>Arenaria pseudofrigida</i> | 25.07.2023 | 75.143    | -19.734184 | Hochstetter   | Greenland | 30   | 1.63 | 388    |
| <i>Arenaria pseudofrigida</i> | 25.07.2023 | 75.143    | -19.734184 | Hochstetter   | Greenland | 30   | 1.69 | 170    |
| <i>Arenaria pseudofrigida</i> | 25.07.2023 | 75.143    | -19.734184 | Hochstetter   | Greenland | 30   | 1.71 | 989    |
| <i>Arenaria norvegica</i>     | 24.06.2023 | 64.690833 | -21.453611 | Borgarnes     | Iceland   | 60   | 2.89 | 728    |
| <i>Arenaria norvegica</i>     | 24.06.2023 | 64.690833 | -21.453611 | Borgarnes     | Iceland   | 60   | 2.81 | 269    |
| <i>Arenaria norvegica</i>     | 24.06.2023 | 64.690833 | -21.453611 | Borgarnes     | Iceland   | 60   | 2.80 | 203    |

|                                     |            |           |            |                     |             |      |      |     |
|-------------------------------------|------------|-----------|------------|---------------------|-------------|------|------|-----|
| <i>Arenaria norvegica</i>           | 24.06.2023 | 64.690833 | -21.453611 | Borgarnes           | Iceland     | 60   | 2.77 | 192 |
| <i>Arenaria norvegica</i>           | 24.06.2023 | 65.5775   | -22.167778 | Reykholahreppur     | Iceland     | 50   | 2.68 | 141 |
| <i>Arenaria norvegica</i>           | 24.06.2023 | 65.5775   | -22.167778 | Reykholahreppur     | Iceland     | 50   | 2.81 | 417 |
| <i>Arenaria norvegica</i>           | 24.06.2023 | 65.5775   | -22.167778 | Reykholahreppur     | Iceland     | 50   | 2.80 | 228 |
| <i>Arenaria norvegica</i>           | 24.06.2023 | 65.5775   | -22.167778 | Reykholahreppur     | Iceland     | 50   | 2.73 | 119 |
| <i>Arenaria norvegica</i>           | 24.06.2023 | 65.5775   | -22.167778 | Reykholahreppur     | Iceland     | 50   | 2.78 | 215 |
| <i>Arenaria norvegica</i>           | 25.06.2023 | 65.559722 | -24.003056 | Latrabjarg          | Iceland     | 30   | 2.76 | 310 |
| <i>Arenaria norvegica</i>           | 25.06.2023 | 65.559722 | -24.003056 | Latrabjarg          | Iceland     | 30   | 2.86 | 153 |
| <i>Arenaria norvegica</i>           | 25.06.2023 | 65.559722 | -24.003056 | Latrabjarg          | Iceland     | 30   | 2,78 | 179 |
| <i>Arenaria norvegica</i>           | 25.06.2023 | 65.559722 | -24.003056 | Latrabjarg          | Iceland     | 30   | 2,78 | 325 |
| <i>Arenaria norvegica</i>           | 25.06.2023 | 65.559722 | -24.003056 | Latrabjarg          | Iceland     | 30   | 2,81 | 178 |
| <i>Arenaria norvegica</i>           | 25.06.2023 | 65.559722 | -24.003056 | Latrabjarg          | Iceland     | 30   | 2,80 | 117 |
| <i>Arenaria norvegica</i>           | 25.06.2023 | 65.5275   | -24.4375   | Latrabjarg          | Iceland     | 90   | 2,83 | 196 |
| <i>Arenaria norvegica</i>           | 25.06.2023 | 65.5275   | -24.4375   | Latrabjarg          | Iceland     | 90   | 2,79 | 172 |
| <i>Arenaria norvegica</i>           | 25.06.2023 | 65.5275   | -24.4375   | Latrabjarg          | Iceland     | 90   | 2,79 | 169 |
| <i>Arenaria norvegica</i>           | 25.06.2023 | 65.5275   | -24.4375   | Latrabjarg          | Iceland     | 90   | 2,75 | 198 |
| <i>Arenaria norvegica</i>           | 25.06.2023 | 65.5275   | -24.4375   | Latrabjarg          | Iceland     | 90   | 2,83 | 248 |
| <i>Arenaria norvegica</i>           | 21.06.2010 | 58.124883 | -4.9229    | Scotland            | UK          | 300  | 2,87 | 181 |
| <i>Arenaria gothica</i>             | 06.07.2017 | 58.004167 | 18.563056  | Gotland             | Sweden      | 68   | 4,41 | 162 |
| <i>Arenaria gothica</i>             | 07.07.2017 | 57.854167 | 18.865833  | Gotland             | Sweden      | 9    | 4,33 | 239 |
| <i>Arenaria gothica</i>             | 06.07.2017 | 58.004167 | 18.563056  | Gotland             | Sweden      | 68   | 3,94 | 212 |
| <i>Arenaria gothica</i>             | 07.07.2017 | 57.854167 | 18.865833  | Gotland             | Sweden      | 9    | 3.9  | 291 |
| <i>Arenaria multicaulis</i>         | 18.08.2023 | 46.403889 | 7.613611   | Daubensee, VS       | Switzerland | 2220 | 1.57 | 160 |
| <i>Arenaria multicaulis</i>         | 18.08.2023 | 46.404444 | 7.615833   | Daubensee, VS       | Switzerland | 2220 | 1.45 | 139 |
| <i>Arenaria multicaulis</i>         | 18.08.2023 | 46.406111 | 7.619722   | Daubensee, VS       | Switzerland | 2230 | 1.58 | 273 |
| <i>Arenaria multicaulis</i>         | 18.08.2023 | 46.419444 | 7.625556   | Daubensee, VS       | Switzerland | 2260 | 1.43 | 146 |
| <i>Arenaria multicaulis</i>         | 18.08.2023 | 46.398056 | 7.576389   | Daubensee, VS       | Switzerland | 2330 | 1.49 | 281 |
| <i>Arenaria c. subsp. bernensis</i> | 06.09.2023 | 46.5143   | 7.13803    | Pointe de Paray, VD | Switzerland | 2319 | 6.86 | 570 |
| <i>Arenaria c. subsp. bernensis</i> | 06.09.2023 | 46.51414  | 7.13755    | Pointe de Paray, VD | Switzerland | 2343 | 7.02 | 264 |
| <i>Arenaria c. subsp. bernensis</i> | 06.09.2023 | 46.51363  | 7.1375     | Pointe de Paray, VD | Switzerland | 2361 | 6.77 | 788 |
| <i>Arenaria c. subsp. bernensis</i> | 14.08.2023 | 46.43267  | 6.9766     | Rochers de Naye, VD | Switzerland | 2022 | 6.65 | 368 |

|                                     |            |          |         |                       |             |      |      |     |
|-------------------------------------|------------|----------|---------|-----------------------|-------------|------|------|-----|
| <i>Arenaria c. subsp. bernensis</i> | 14.08.2023 | 46.43264 | 6.97657 | Rochers de Naye, VD   | Switzerland | 2020 | 6.51 | 374 |
| <i>Arenaria c. subsp. bernensis</i> | 14.08.2023 | 46.43268 | 6.97656 | Rochers de Naye, VD   | Switzerland | 2020 | 6.53 | 106 |
| <i>Arenaria c. subsp. bernensis</i> | 14.08.2023 | 46.43311 | 6.97718 | Rochers de Naye, VD   | Switzerland | 2020 | 6.74 | 118 |
| <i>Arenaria c. subsp. bernensis</i> | 14.08.2023 | 46.4331  | 6.97717 | Rochers de Naye, VD   | Switzerland | 2020 | 6.68 | 171 |
| <i>Arenaria c. subsp. bernensis</i> | 14.08.2023 | 46.43309 | 6.97719 | Rochers de Naye, VD   | Switzerland | 2020 | 6.71 | 139 |
| <i>Arenaria c. subsp. bernensis</i> | 16.08.2023 | 46.528   | 7.20379 | Dent de Combettes, VD | Switzerland | 2079 | 7.02 | 119 |
| <i>Arenaria c. subsp. bernensis</i> | 16.08.2023 | 46.52812 | 7.20352 | Dent de Combettes, VD | Switzerland | 2012 | 6.96 | 167 |
| <i>Arenaria ciliata</i> s.str.      | 16.08.2023 | 46.52403 | 7.19905 | Rochers des Rayes, VD | Switzerland | 1940 | 1.57 | 215 |
| <i>Arenaria ciliata</i> s.str.      | 16.08.2023 | 46.52411 | 7.19919 | Rochers des Rayes, VD | Switzerland | 1955 | 1.67 | 227 |
| <i>Arenaria ciliata</i> s.str.      | 16.08.2023 | 46.52415 | 7.19921 | Rochers des Rayes, VD | Switzerland | 1955 | 1.69 | 254 |
| <i>Arenaria ciliata</i> s.str.      | 16.08.2023 | 46.52812 | 7.20356 | Dent de Combettes, VD | Switzerland | 2012 | 1.60 | 531 |

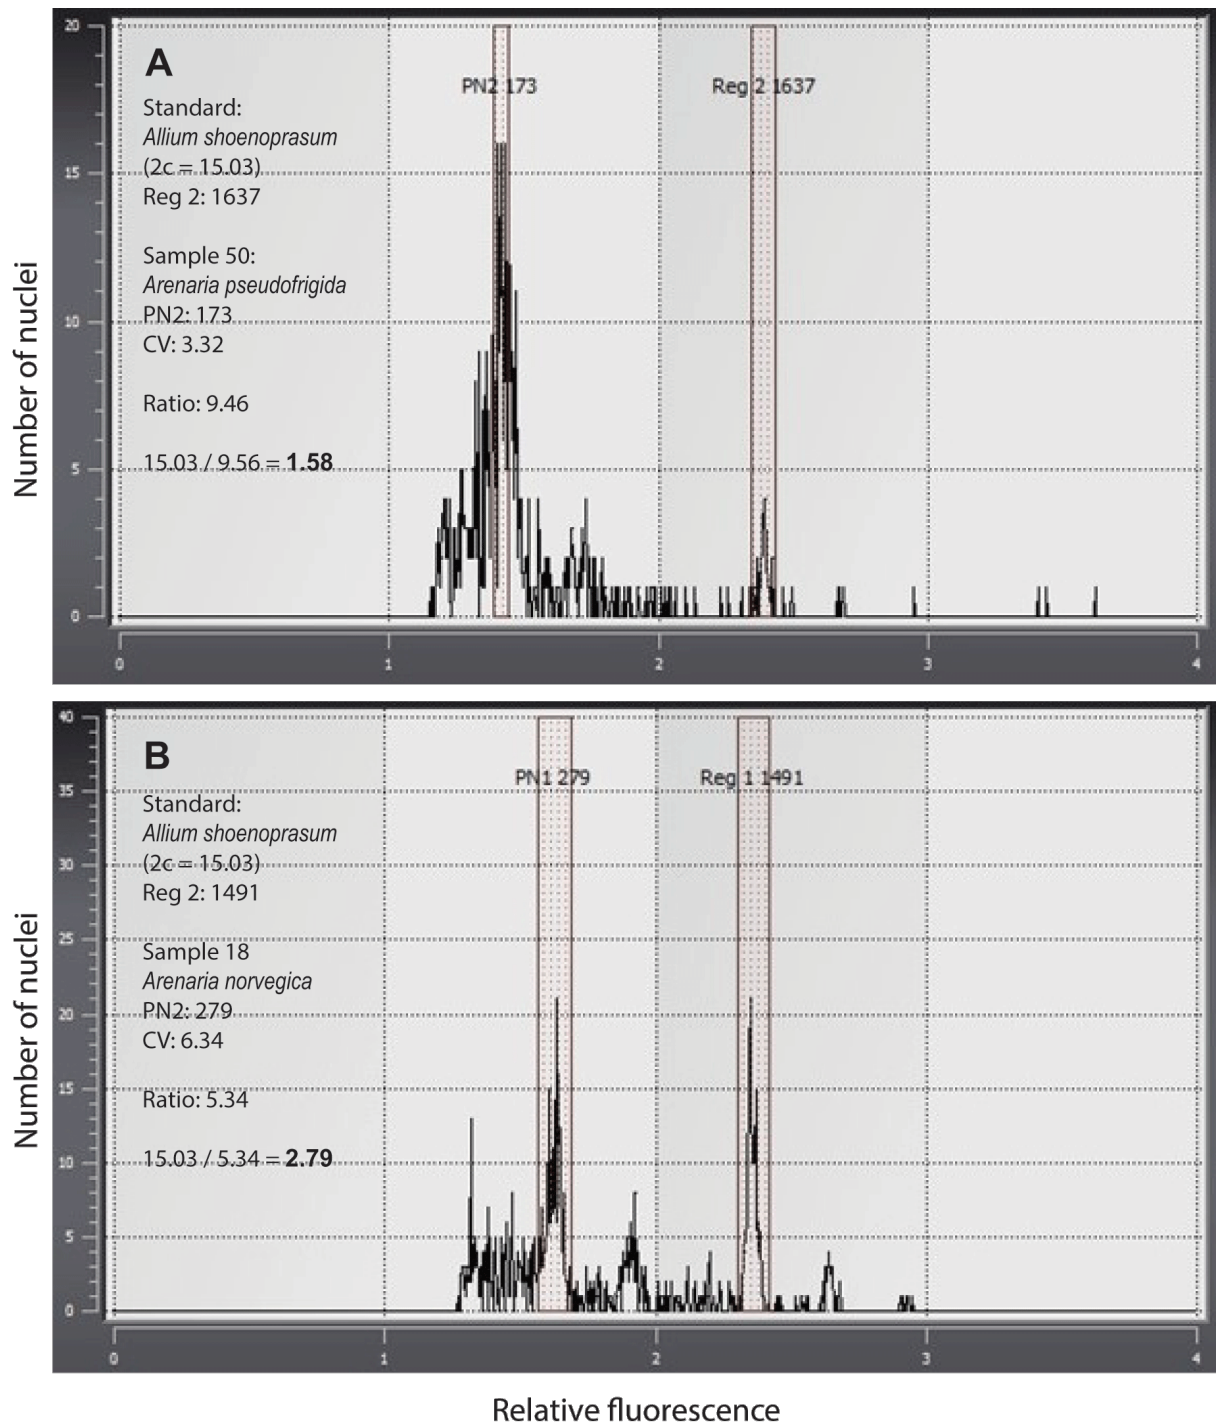

**Figure S1.** Examples of histograms of genome size estimations using flow cytometry. A: *Arenaria pseudofrigida* from Traill Island, Greenland. B: *Arenaria norvegica* from Latrabjarg, Iceland (Plant Cytometry Services, Didam, The Netherlands, [www.plantcytometry.nl](http://www.plantcytometry.nl)).
